# Supplementary material for: RETRACTED ARTICLE: Annexin A1-suppressed autophagy promotes nasopharyngeal carcinoma cell invasion and metastasis by PI3K/AKT signaling activation
Source: PubMed Central journal article supplement (PMC6244011; doi:10.1038/s41419-018-1204-7), 2018-11-20
Supplement: 41419_2018_1204_MOESM1_ESM.pdf [file 41419_2018_1204_MOESM1_ESM.pdf]

**Supplementary Table S1. Expression of ANXA1, SQSTM1 and p-AKT in nasopharyngeal carcinomas (n=127,  $\chi^2$  test)**

|                    | <b>NPC without metastasis</b> | <b>NPC with metastasis</b> | <b>P value</b> |
|--------------------|-------------------------------|----------------------------|----------------|
| <b>ANXA1</b>       |                               |                            |                |
| High(4-6)          | 5                             | 48                         | 0.000          |
| Low(0-3)           | 44                            | 30                         |                |
| <b>SQSTM1</b>      |                               |                            |                |
| High(4-6)          | 16                            | 51                         | 0.000          |
| Low(0-3)           | 33                            | 27                         |                |
| <b>p-AKT(S473)</b> |                               |                            |                |
| High(4-6)          | 17                            | 55                         | 0.000          |
| Low(0-3)           | 32                            | 23                         |                |

**Supplementary Table S2. Correlation between ANXA1 expression and clinicopathological characteristics in nasopharyngeal carcinomas (n=127,  $\chi^2$  test)**

| <b>Variables</b>                 | <b>n</b> | <b>Expression level</b> |                   | <b>P value</b> |
|----------------------------------|----------|-------------------------|-------------------|----------------|
|                                  |          | <b>Low (0-3)</b>        | <b>High (4-6)</b> |                |
| <b>Gender</b>                    |          |                         |                   |                |
| Male                             | 92       | 57                      | 35                | 0.227          |
| Female                           | 35       | 17                      | 18                |                |
| <b>Age(y)</b>                    |          |                         |                   |                |
| <48                              | 57       | 34                      | 23                | 0.857          |
| $\geq$ 48                        | 70       | 40                      | 30                |                |
| <b>Primary tumor (T) stage</b>   |          |                         |                   |                |
| T1-2                             | 43       | 26                      | 17                | 0.849          |
| T3-4                             | 84       | 48                      | 36                |                |
| <b>lymph node (N) metastasis</b> |          |                         |                   |                |
| N0                               | 49       | 37                      | 12                | 0.029          |
| N1-3                             | 78       | 37                      | 41                |                |
| <b>Distant metastasis (M)</b>    |          |                         |                   |                |
| M0                               | 99       | 69                      | 30                | 0.000          |
| M1                               | 28       | 5                       | 23                |                |
| <b>Clinical TNM stage</b>        |          |                         |                   |                |
| I-II                             | 24       | 20                      | 4                 | 0.006          |
| III-IV                           | 103      | 54                      | 49                |                |

**Supplementary Table S3. The correlation between ANXA1 and p-AKT(S473) expression in NPCs (n=127, Spearman's correlation test)**

|                         | <b>ANXA1 (H)</b> | <b>ANXA1 (L)</b> |
|-------------------------|------------------|------------------|
| <b>p-AKT(S473) (H)</b>  | 50               | 22               |
| <b>p-AKT(S473) (L)</b>  | 3                | 52               |
| <b>Total (T)</b>        | 53               | 74               |
| <b>Percentage (H/T)</b> | 94.3%            | 29.7%            |

Spearman's correlation = 0.619, *P* value < 0.001

**Supplementary Table S4. The correlation between SQSTM1 and p-AKT(S473) expression in NPCs (n=127, Spearman's correlation test)**

|                         | <b>SQSTM1 (H)</b> | <b>SQSTM1 (L)</b> |
|-------------------------|-------------------|-------------------|
| <b>p-AKT(S473) (H)</b>  | 60                | 12                |
| <b>p-AKT(S473) (L)</b>  | 7                 | 48                |
| <b>Total (T)</b>        | 67                | 60                |
| <b>Percentage (H/T)</b> | 89.6%             | 20.0%             |

Spearman's correlation = 0.594, *P* value < 0.001

**Supplementary Table S5. The clinicopathological parameters of 127 patients with nasopharyngeal carcinoma**

| <b>Variable</b>                 | <b>No. of patients</b> | <b>%</b> |
|---------------------------------|------------------------|----------|
| <b>Gender</b>                   |                        |          |
| Male                            | 92                     | 72.44    |
| Female                          | 35                     | 27.56    |
| <b>Age</b>                      |                        |          |
| <48                             | 57                     | 44.88    |
| ≥48                             | 70                     | 55.12    |
| <b>Primary tumor(T) stage</b>   |                        |          |
| T1-2                            | 43                     | 34.65    |
| T3-4                            | 84                     | 65.35    |
| <b>Lymph node(N) metastasis</b> |                        |          |
| N0                              | 49                     | 38.58    |
| N1-3                            | 78                     | 61.41    |
| <b>Distant metastasis(M)</b>    |                        |          |
| M0                              | 99                     | 77.95    |
| M1                              | 28                     | 22.05    |
| <b>Clinical stage</b>           |                        |          |
| I-II                            | 24                     | 18.90    |
| III-IV                          | 103                    | 81.10    |

**Supplementary Table S6. The primers used for the amplification of the six genes by qRT-PCR**

| <b>No.</b> | <b>Gene name</b> | <b>GenBank<br/>Accession No.</b> | <b>Primer sequence</b>                               |
|------------|------------------|----------------------------------|------------------------------------------------------|
| 1          | Annexin A1       | NM_000700                        | F: GAGGAGGTTGTTTTAGCTCTGC<br>R: AGCAAAGCGTTCGAAAATCT |
| 2          | E-cadherin       | NM_004360                        | F: CTTAGAGGTCAGCGTGTGTG<br>R: AGCAAGAGCAGCAGAATCAG   |
| 3          | Vimentin         | NM_003380                        | F: AATGGCTCGTCACCTTCG<br>R: CTAGTTTCAACCGTCTTAATCAG  |
| 4          | N-cadherin       | NM_004061                        | F: CCACGCCGAGCCCCAGTATC<br>R: CCCCAGTCGTTTCAGGTAATCA |
| 5          | Snail            | NM_005985                        | F: CCCCAATCGGAAGCCTAA<br>R: CCTTTCCCACTGTCCTCAT      |
| 6          | GAPDH            | NM_002046                        | F: TGACTTCAACAGCGACACCCA<br>R: CACCCTGTTGCTGTAGCCAAA |
